# Supplementary material for: An overall uncertainty approach for the validation of analytical separation methods
Source: Royal Society of Chemistry journal article supplement (doi:10.1039/c3an00519d), 2013-01-01
Supplement: c3an00519d.xlsx [file c3an00519d.xlsx]

## Sheet: Figure 1
	X(ng/ml)	Acceptability High(%)	Acceptability Low(%)	high uncertainty limit(%): method 1	Low uncertainty limit(%): method 1
	0.25	10	-10	-1.35	-8.42
	0.5	10	-10	6.14	0
	1.5	10	-10	1.48	-1.85
		Fig. 1: Uncertainty profile of the HPAE-PAD method for the determination of 1-kestose in fruit juices using Mee’s method. Acceptance limits are set at ±10%.

## Sheet: Figure 2
	X(ng/ml)	Acceptability High(%)	Acceptability Low(%)	high uncertainty limit(%): method 1	Low uncertainty limit(%): method 1
	50	20	-20	4.9	-5
	250	20	-20	1.5	-2.5
	2500	20	-20	4.8	-4.8
	5000	20	-20	8	-8.3
		Fig. 2: Uncertainty profile of the LC-UV method for the determination of cloxacillin in human plasma using Mee’s method. Acceptance limits are set at ±20%

## Sheet: Figure 3
	Concentration (ng/ml)	Acceptability High(%)	Acceptability Low(%)	Low uncertainty limit(%): method 1	high uncertainty limit(%): method 1
	1.6	30	-30	-14.7	16.5
	4.8	30	-30	-15.5	18.9
	9.6	30	-30	-12.5	24.9
	Fig. 3: Uncertainty profile of the SPE-LC–MS method for the determination of 5-S-cysteinyldopa in human plasma using Mee’s method. Acceptance limits are set at ±30%.

## Sheet: Figure 4
	X(ng/ml)	Acceptability High(%)	Acceptability Low(%)	high uncertainty limit(%): method 1	Low uncertainty limit(%): method 1
	81.6	15	-15	21.4	-21.6
	163.2	15	-15	11.2	-5.4
	367.1	15	-15	9.7	-9.3
	734.2	15	-15	7	-6.2
	1019.7	15	-15	3.3	-4.7
		Fig. 4: Uncertainty profile of the GC-FID analytical method for the quantitative determination of E-β-farnesene using Mee’s method. Acceptance limits are set at ±15%.

## Sheet: Figure 5
	X(ng/ml)	Acceptability High(%)	Acceptability Low(%)	high uncertainty limit(%): method 1	Low uncertainty limit(%): method 1
	80.5	15	-15	28.3	-19.7
	160.9	15	-15	14	-2.6
	362.1	15	-15	6.9	-4.3
	724.2	15	-15	7.1	-4.5
	1005.8	15	-15	4.4	-3.6
		Fig. 5: Uncertainty profile of the GC-FID analytical method for the quantitative determination of β-caryophyllene using Mee’s method. Acceptance limits are set at ±15%.

## Sheet: Figure 6
	X(ng/ml)	Acceptability High(%)	Acceptability Low(%)	high uncertainty limit(%): method 1	Low uncertainty limit(%): method 1
	0.25	30	-30	7.32	0.62
	1	30	-30	-0.82	-1.18
	2.5	30	-30	-1.72	-2.28
		Fig. 6: Uncertainty profile of the HS-GC-MS method for the determination of a carbon monoxide in human blood using Mee’s method. Acceptance limits are set at ±30%.

## Sheet: Figure 7
	X(ng/ml)	Acceptability High(%)	Acceptability Low(%)	high uncertainty limit(%): method 1	Low uncertainty limit(%): method 1
	2	10	-10	9.99	2.15
	5	10	-10	5.35	-7.59
	12	10	-10	7.23	-6.49
	24	10	-10	3.58	-0.84
		Fig. 7: Uncertainty profile of the Nonaqueous Capillary electrophoresis method for the enantiomeric purity determination of S-timolol using Mee’s method. Acceptance limits are set at ±10%.

## Sheet: Figure 8-a
	X(ng/ml)	Acceptability High(%)	Acceptability Low(%)	high uncertainty limit(%): method 1	Low uncertainty limit(%): method 1
	0.25	30	-30	1.44	-15.84
	2.5	30	-30	21.69	-15.29
	3.5	30	-30	10.67	-3.67
		Fig. 8 (a): Uncertainty profile of the CE-MS analytical method for the quantitative determination of S-MDMA in plasma treated by the PP-HD procedure using Mee’s method. Acceptance limits are set at ±30%

## Sheet: Figure 8-b
	X(ng/ml)	Acceptability High(%)	Acceptability Low(%)	high uncertainty limit(%): method 1	Low uncertainty limit(%): method 1
	0.25	30	-30	18.49	-23.49
	2.5	30	-30	5.63	-6.23
	3.5	30	-30	3.23	-8.03
		Fig. 9 (b) : Uncertainty profile of the CE-MS analytical method for the quantitative determination of S-MTD in plasma treated by PP-HD procedure using Mee’s method. Acceptance limits are set at ±30%

## Sheet: Figure 9-a
	X(ng/ml)	Acceptability High(%)	Acceptability Low(%)	high uncertainty limit(%): method 1	Low uncertainty limit(%): method 1
	0.5	30	-30	6.07	-15.47
	125	30	-30	6.92	-5.32
	175	30	-30	2.73	-4.53
		Fig. 9 (a): Uncertainty profile of the CE-MS analytical method for the quantitative determination of S-MDMA in plasma treated by the LLE-EK procedure using Mee’s method. Acceptance limits are set at ±30%

[truncated: 1 more sheets: Figure 9-b]
